# Supplementary material for: Pallado-catalysed hydrophosphination of alkynes: access to enantio-enriched P-stereogenic vinyl phosphine–boranes
Source: Royal Society of Chemistry journal article supplement (doi:10.1039/b607434k), 2006-01-01

Current Data Parameters  
 NAME dm677a  
 EXPNO 10  
 PROCNO 1

F2 - Acquisition Parameters  
 Date\_ 20020621  
 Time 8.43  
 INSTRUM spect  
 PROBHD 5 mm BBO BB-1  
 PULPROG zg30  
 TD 32768  
 SOLVENT CDC13  
 NS 16  
 DS 2  
 SWH 8223.685 Hz  
 FIDRES 0.250967 Hz  
 AQ 1.9923444 sec  
 RG 256  
 DW 60.800 usec  
 DE 10.00 usec  
 TE 300.0 K  
 D1 1.00000000 sec  
 P1 10.00 usec  
 SFO1 400.1324710 MHz  
 NUC1 1H  
 PL1 0.00 dB

F2 - Processing parameters  
 SI 16384  
 SF 400.1300000 MHz  
 WDW no  
 SSB 0  
 LB 0.00 Hz  
 GB 0  
 PC 1.00

1D NMR plot parameters  
 CX 20.00 cm  
 FIP 9.000 ppm  
 F1 3601.17 Hz  
 F2 -0.500 ppm  
 FZ -200.07 Hz  
 PPMCM 0.47500 ppm/cm  
 HZCM 190.06175 Hz/cm

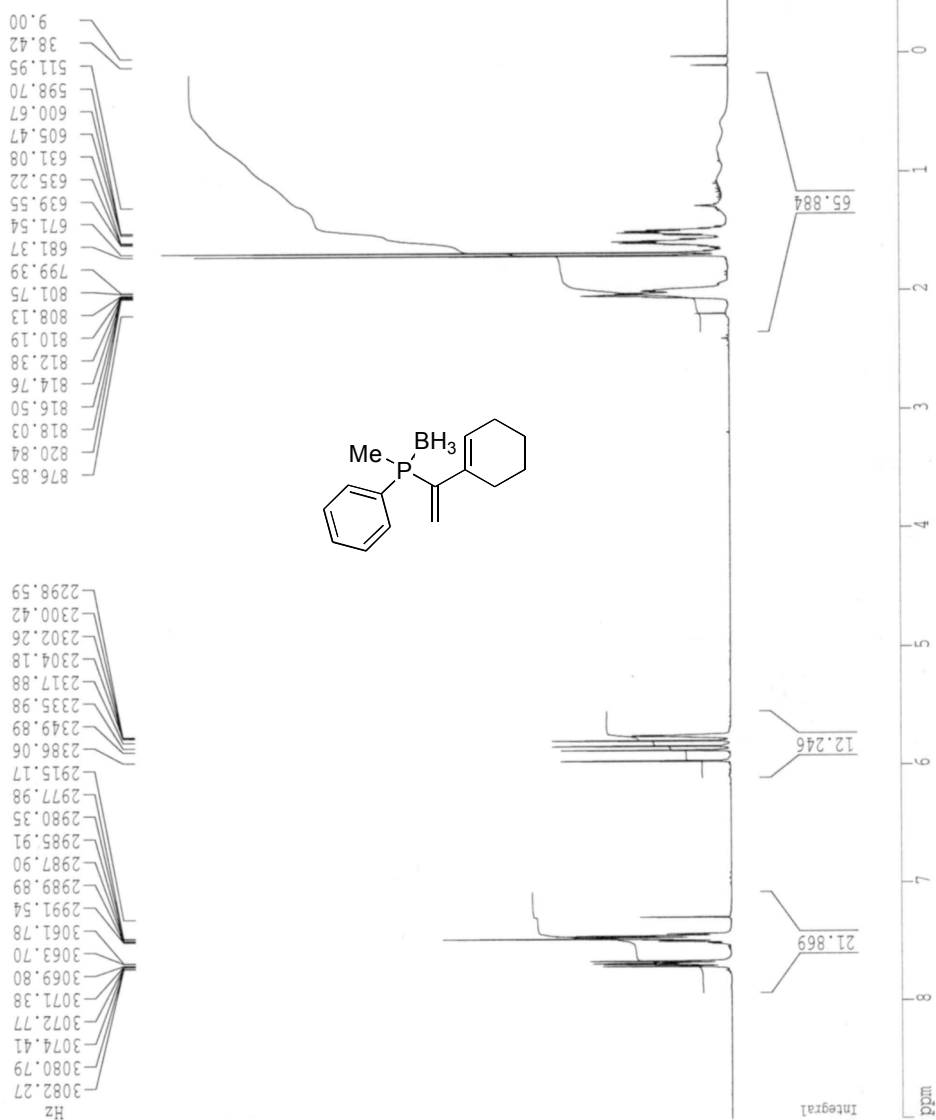

Current Data Parameters  
 NAME dm677a  
 EXPNO 13  
 PROCNO 1

F2 - Acquisition Parameters  
 Date\_ 20020621  
 Time 8.55  
 INSTRUM spect  
 PROHD 5 mm BB0 BB-1  
 PULPROG zgpg30  
 TD 65536  
 SOLVENT CDCl3  
 NS 174  
 DS 2  
 SWH 25195.628 Hz  
 FIDRES 0.383387 Hz  
 AQ 1.3942164 sec  
 RG 512  
 DW 19.900 usec  
 DE 10.00 usec  
 TE 300.0 K  
 D11 0.03000000 sec  
 PL12 16.00 dB  
 CPDPRG2 waltz16  
 PCPD2 100.00 usec  
 SF02 400.1316005 MHz  
 NUC2 1H  
 PL2 16.00 dB  
 D1 2.00000000 sec  
 P1 10.00 usec  
 SF01 100.6248025 MHz  
 NUC1 13C  
 PL1 -3.00 dB

F2 - Processing parameters  
 SI 37768  
 SF 100.6127030 MHz  
 MRW EM  
 SSB 0  
 LB 1.00 Hz  
 GB 0  
 FC 1.40

ID NMR plot parameters  
 CX 22.00 cm  
 FIP 244.863 ppm  
 F1 24636.34 Hz  
 F2P -4.863 ppm  
 F2 -485.28 Hz  
 PPMCM 11.35119 ppm/cm  
 HZCM 1142.07397 Hz/cm

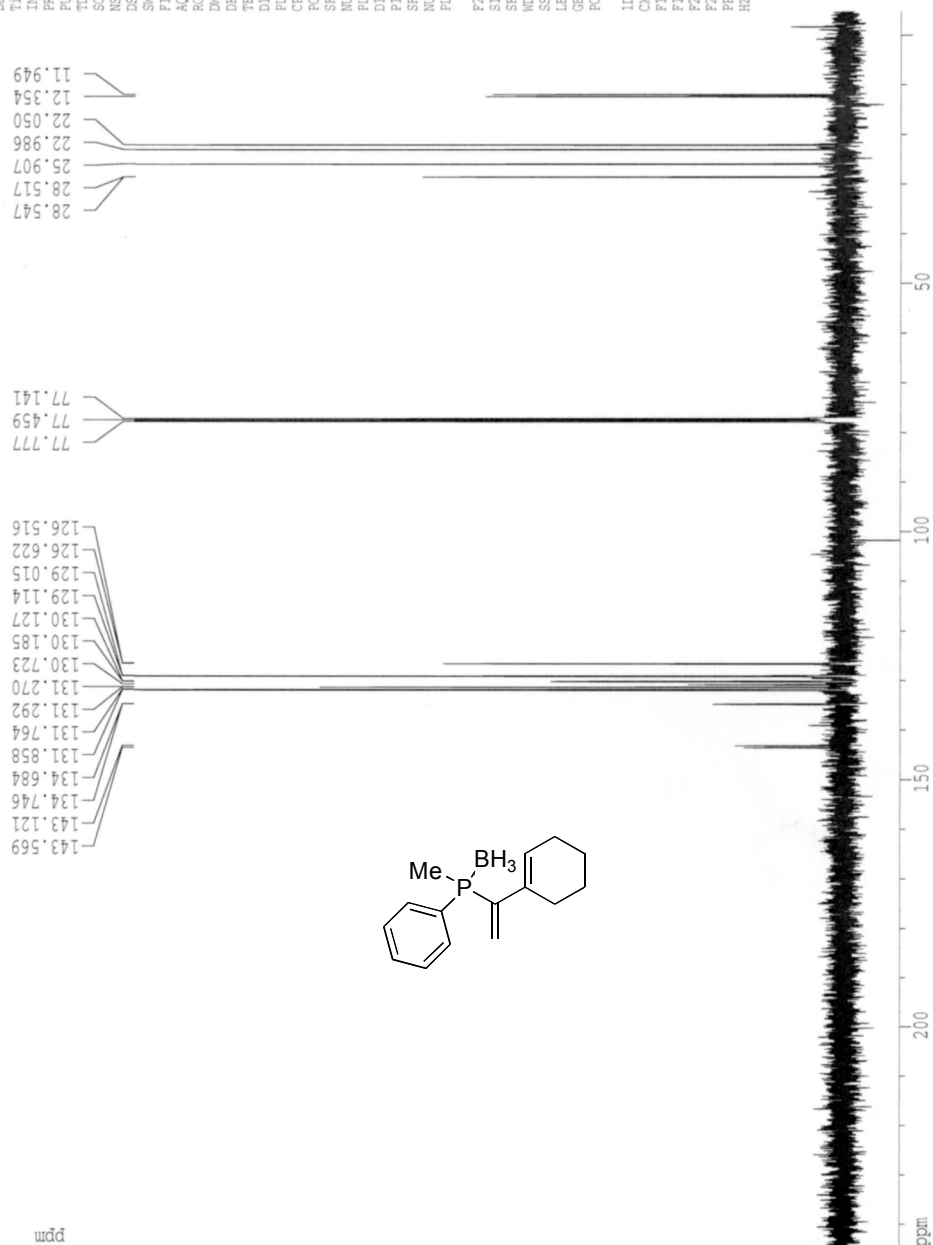

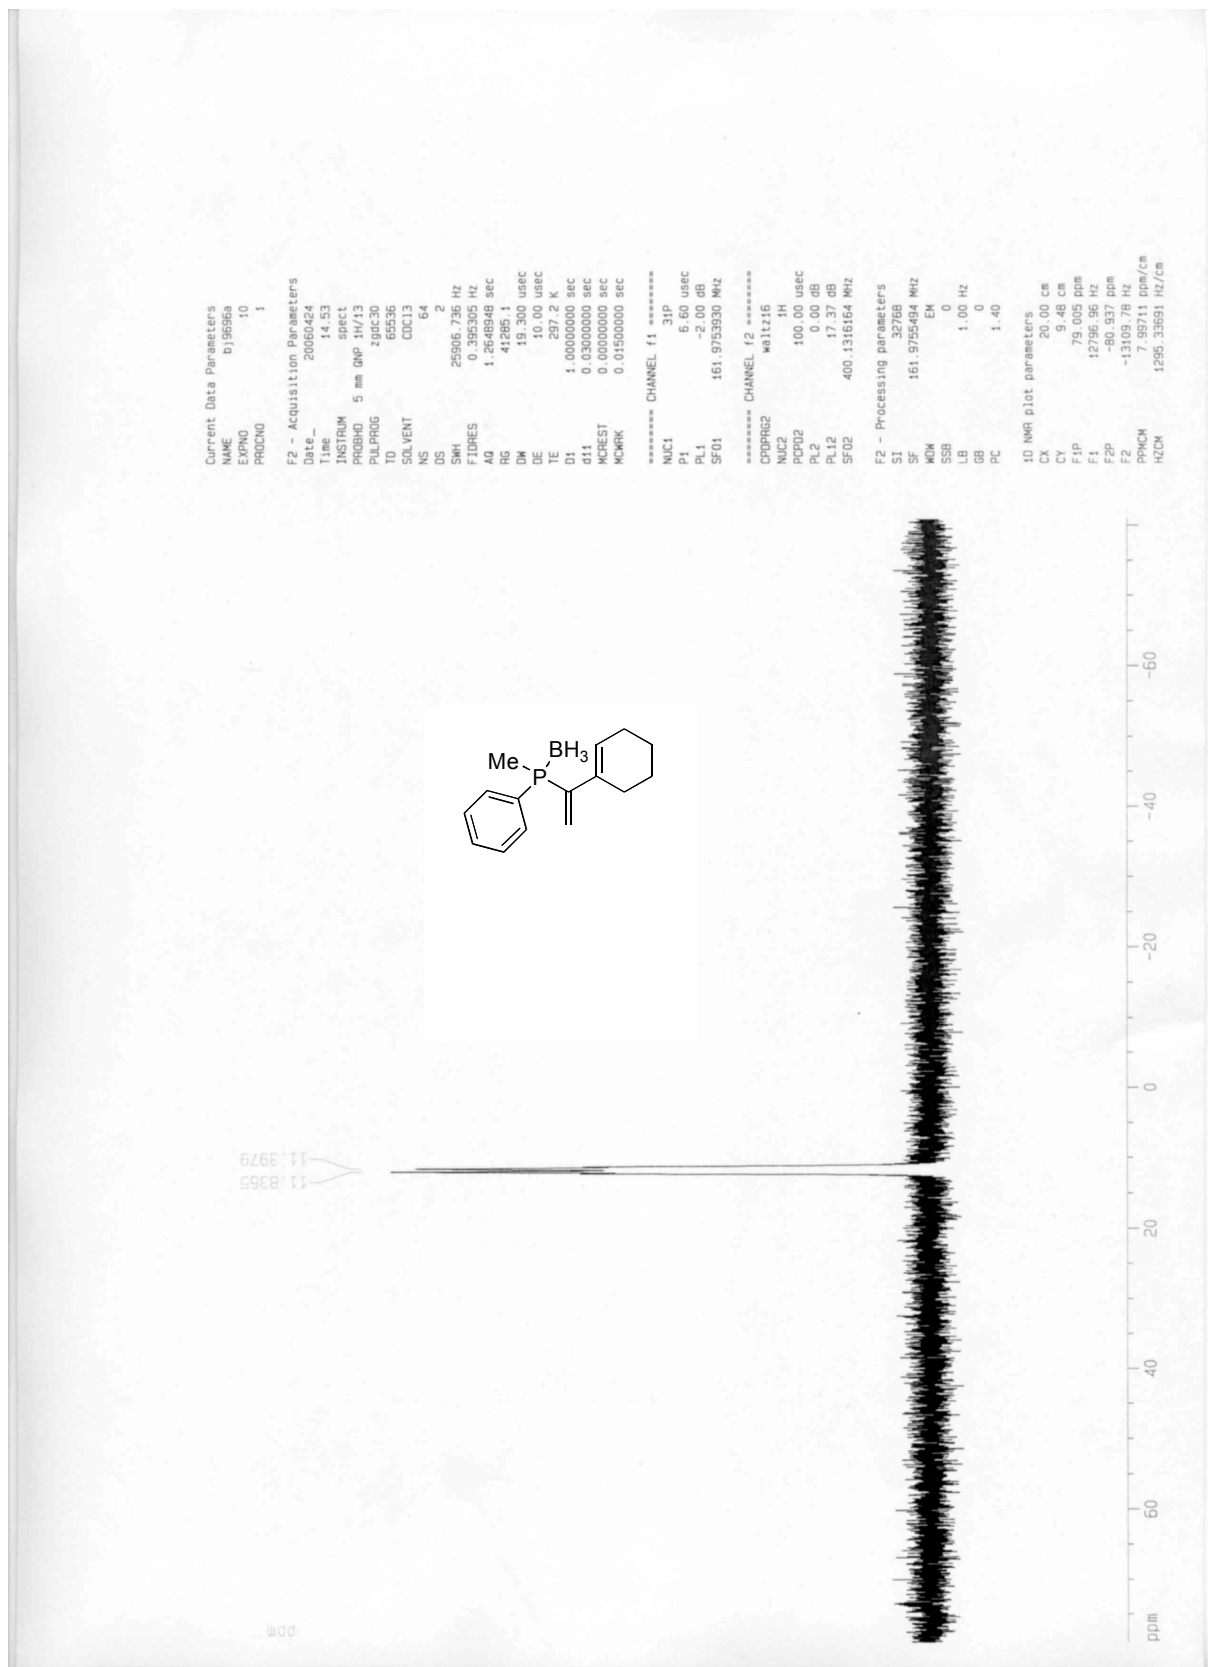

Current Data Parameters  
 NAME dm677a  
 EXNO 12  
 PROCNO 1

F2 - Acquisition Parameters  
 Date\_ 20020621  
 Time\_ 8.51  
 INSTRUM spect  
 PROBHD 5 mm BBO BB-1  
 PULPROG zg  
 TD 3422  
 SOLVENT D2O  
 NS 75  
 DS 2  
 SWH 8561.644 Hz  
 FIDRES 2.50194 Hz  
 AQ 0.1998948 sec  
 RG 1024  
 DW 58.400 usec  
 DE 10.00 usec  
 TE 300.0 K  
 D1 1.00000000 sec  
 F1 7.50 usec  
 SFO1 128.372198 MHz  
 NUC1 11B  
 FL1 0.00 dB

F2 - Processing parameters  
 SI 32768  
 SF 128.3772150 MHz  
 WDW EM  
 SSB 0  
 LB 1.00 Hz  
 GB 0  
 PC 1.40

1D NMR plot parameters  
 CX 20.00 cm  
 F1P -1.654 ppm  
 F1 -212.38 Hz  
 F2P -68.346 ppm  
 F2 -8774.02 Hz  
 EPCACM 3.33457 ppm/cm  
 HZCM 428.06218 Hz/cm

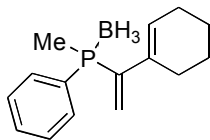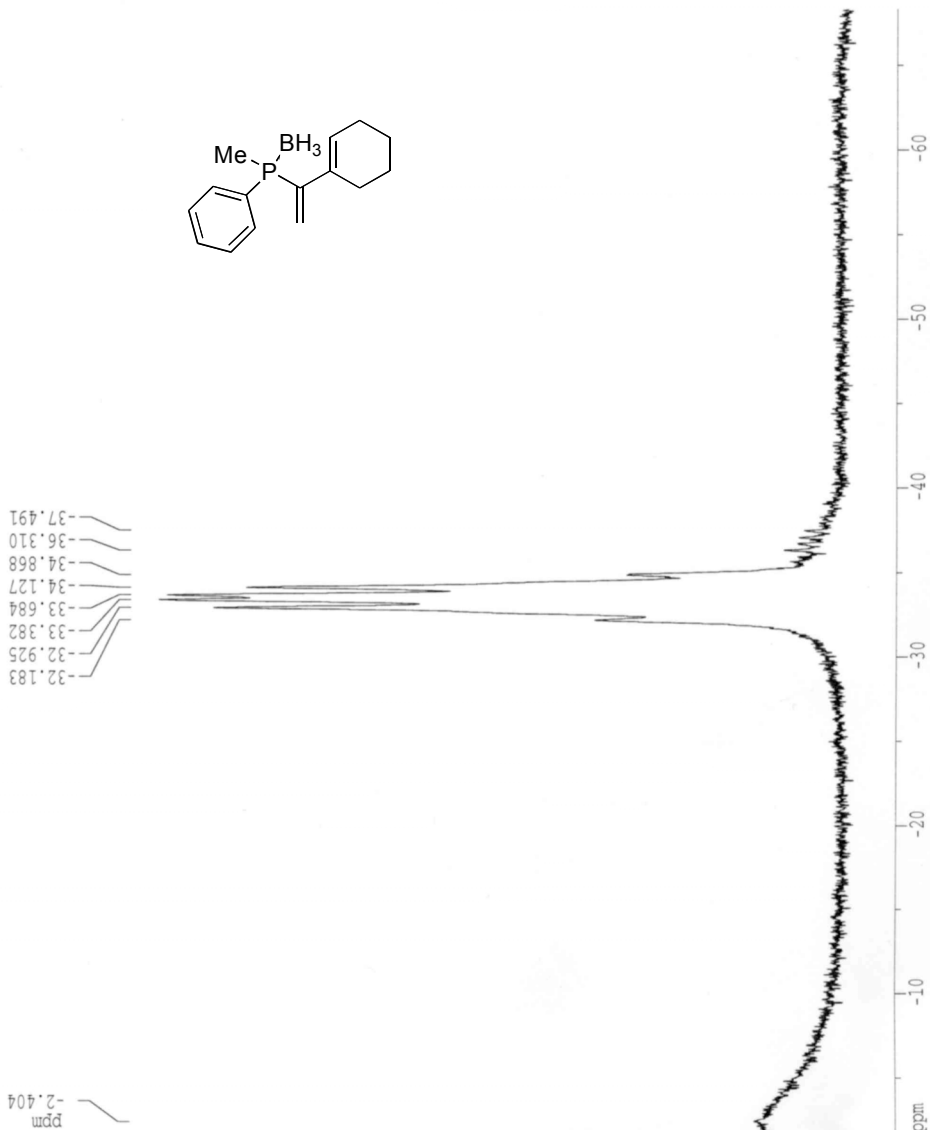

### Instrument Method: IM 1mL 37 63

Stored: 26/01/06 09:28:17

Comments Col. Daicel AD-RH 150mmx4,6mm 5µm 1mL/mn 37%acétonitrile 63%eau  
 Modified User System  
 Locked No  
 Method Id 1018  
 Method Version 1  
 Edit User

#### Revision History

Version 1 26/01/06 09:28:17 User System Method copied into project.  
 Version 1 17/11/04 10:09:47 User System Method copied into project.

#### Sample Information

SampleName bj9596b-test  
 Vial 7  
 Injection 1  
 Injection Volume 10,00 ul  
 Channel 996  
 Run Time 90,0 Minutes

Sample Type Unknown  
 Date Acquired 10/02/06 16:38:31  
 Acq Method Set MS 1mL 37 63  
 Processing Method PM 1 mL 37 63  
 Date Processed 10/02/06 18:32:46

#### Auto-Scaled Chromatogram

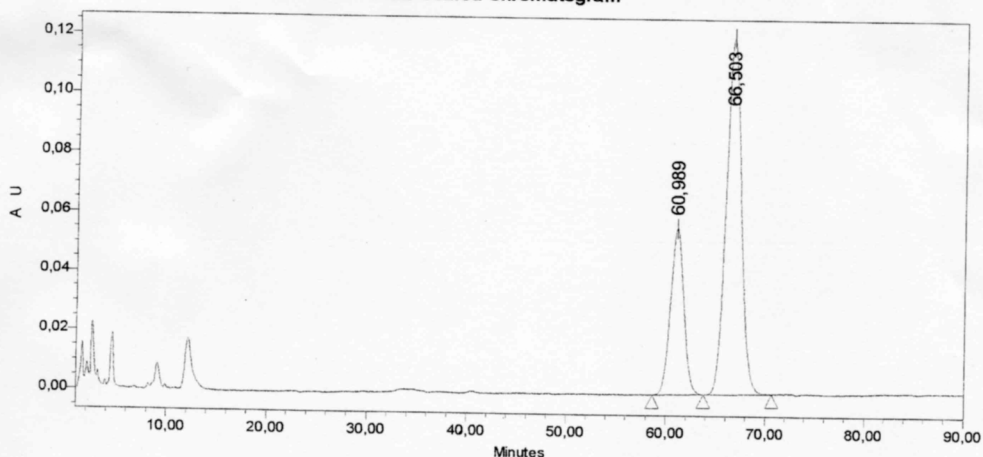

Processed Channel Descr. PDA 196,0 nm

analyse réalisée : température colonne = 25°C, température ambiante = 20°C

#### Peak Results

| Name | RT     | Area     | % Area | Start Time | End Time |
|------|--------|----------|--------|------------|----------|
| 1    | 60,989 | 5212232  | 29,08  | 58,628     | 63,778   |
| 2    | 66,503 | 12708751 | 70,92  | 63,778     | 70,670   |

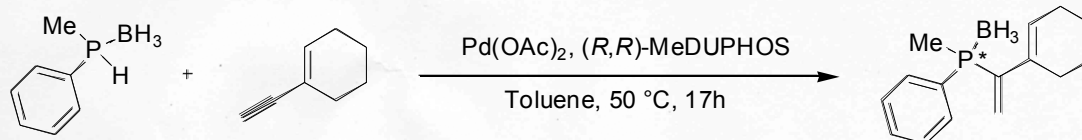

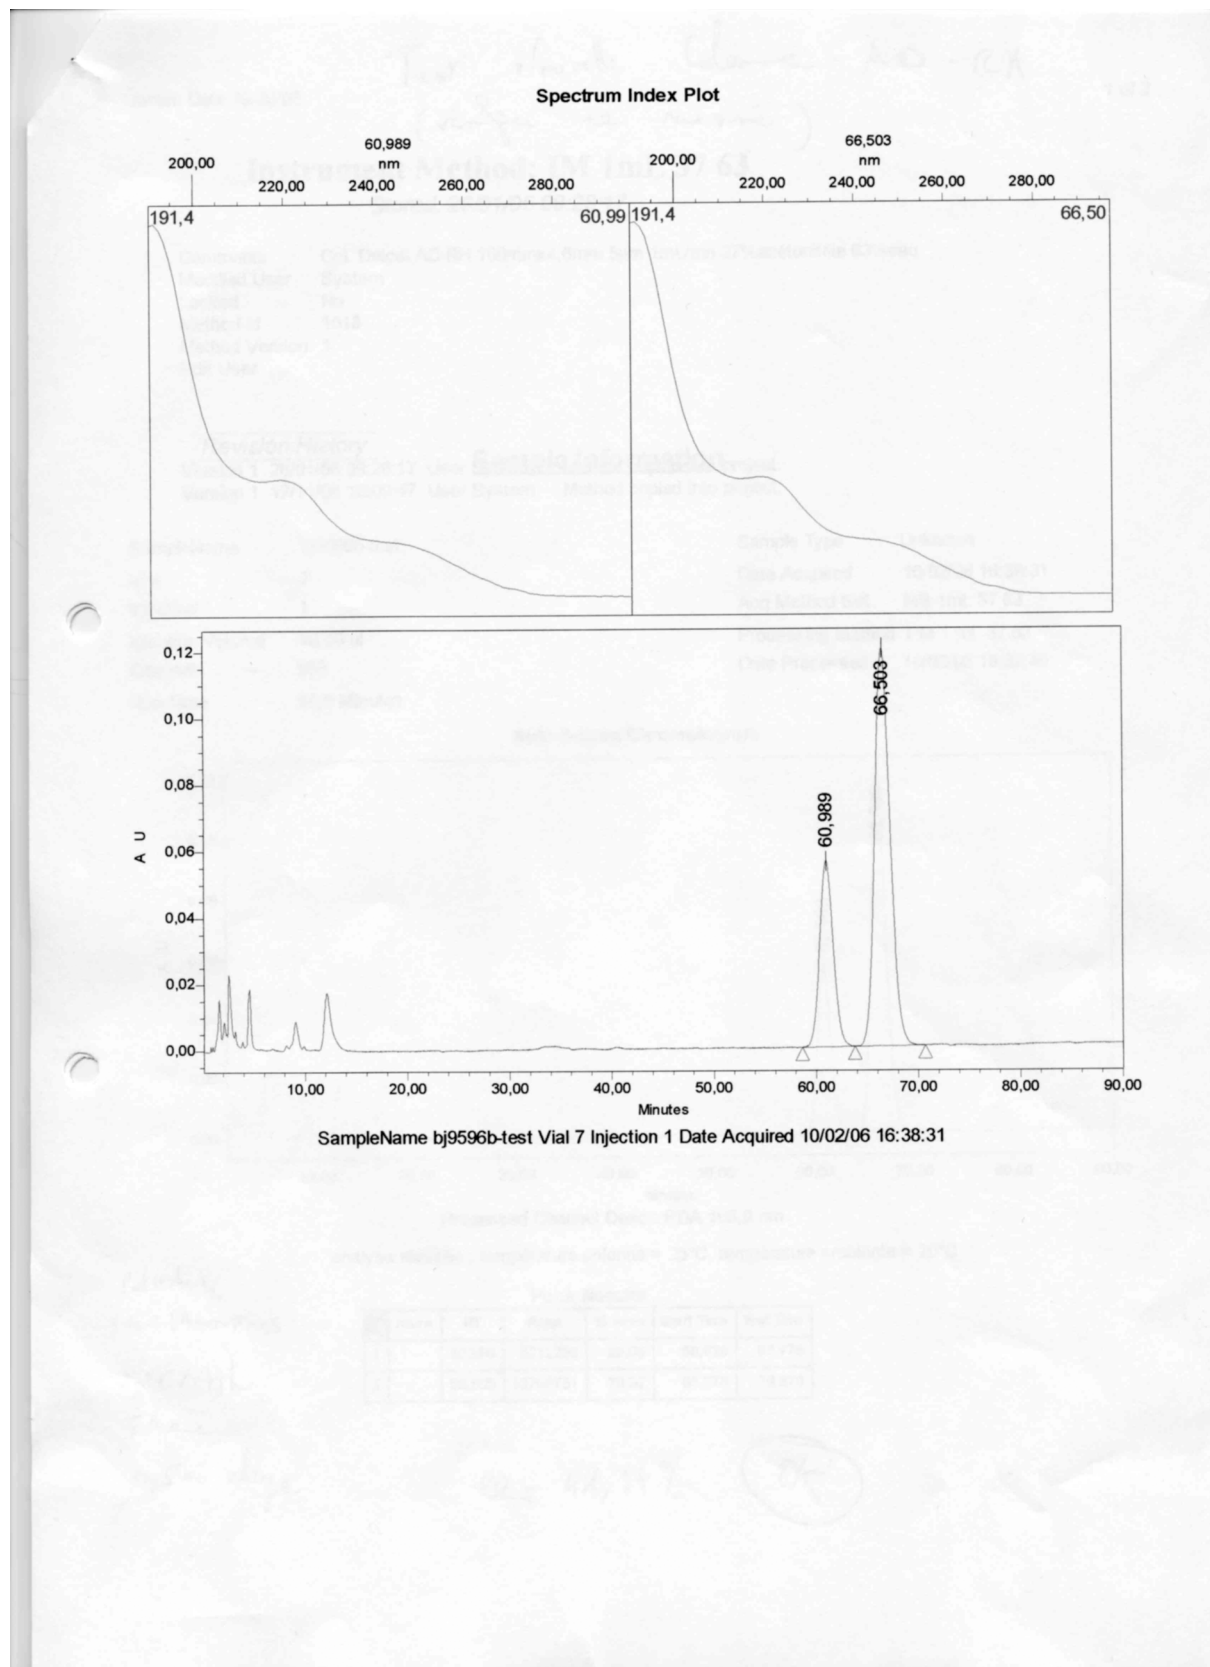

Supplement: b607434k.pdf [file b607434k.pdf]
